# Supplementary material
Source: HighWire-hosted journal article supplement (http://m.jnis.bmj.com/highwire/filestream/142962/field_highwire_adjunct_files/0/neurintsurg-2013-010656supp_table.pdf)
Supplement: neurintsurg-2013-010656supp_table.pdf [file neurintsurg-2013-010656supp_table.pdf]

## Web-Only Supplemental Files:

**Supplemental Table 1:** Comparison of hypothermia treated patients versus historical normothermia controls

| Baseline Characteristics                                      | Hypothermia,<br>n=20 | Normothermia,<br>n=68 |
|---------------------------------------------------------------|----------------------|-----------------------|
| <b>Demographics</b>                                           |                      |                       |
| Age, mean (STD)                                               | 59.7 (14.6)          | 65.1 (14.3)           |
| Male Gender, No. (%)                                          | 12 (60%)             | 33 (49%)              |
| Hypertension, No. (%)                                         | 16 (80%)             | 45 (66%)              |
| Diabetes, No. (%)                                             | 5 (25%)              | 18 (26%)              |
| Atrial Fibrillation, No. (%)                                  | 6 (30%)              | 15 (22%)              |
| <b>Neurological Severity</b>                                  |                      |                       |
| NIHSS, median (IQR)                                           | 19 (16-22)           | 20 (17-24)            |
| ASPECTS, median (IQR)                                         | 6 (6-7)              | 6 (6-7)               |
| <b>Treatment</b>                                              |                      |                       |
| Symptom Onset to GP (mins), median (IQR)                      | 309 (245-400)        | 315 (235-426)         |
| IV tPA, No. (%)                                               | 10 (50%)             | 37 (54%)              |
| Stent-Retriever Use, No. (%)                                  | 18 (90%)             | 18 (26%)              |
| Intubation, No. (%)                                           | 20 (100%)            | 47 (69%)              |
| <b>Complications</b>                                          |                      |                       |
| Asymptomatic Hemorrhage (HI1/HI2), No. (%)                    | 2 (10%)              | 26 (38%)              |
| Symptomatic Hemorrhage (PH1/PH2), No. (%)                     | 1 (5%)               | 8 (12%)               |
| Nosocomial Pneumonia, No. (%)                                 | 5 (25%)              | 17 (25%)              |
| <b>Outcomes</b>                                               |                      |                       |
| Post-Procedural Infarct Volume cm <sup>3</sup> , median (IQR) | 78 (16-107)          | 83 (45-124)           |
| Mortality at Discharge, No. (%)                               | 6 (30%)              | 27 (40%)              |
| Disposition to Acute Rehab, No. (%)                           | 7 (35%)              | 15 (22%)              |
| Good Outcomes at 90 days (mRS 0-2), No. (%)                   | 6 (30%)              | 12 (18%)              |
